# Supplementary material
Source: PubMed Central journal article supplement (PMC5935619)
Supplement: 40744_2018_106_MOESM1_ESM.pdf [file 40744_2018_106_MOESM1_ESM.pdf]

## Supplementary Material

**Table S1** Eligibility criteria (PICOS) for the SLR

| Criteria     | Inclusion criteria                                                                                                                                                                                                                                                                                                                                                                                                                                            | Exclusion criteria                                                                                                                              |
|--------------|---------------------------------------------------------------------------------------------------------------------------------------------------------------------------------------------------------------------------------------------------------------------------------------------------------------------------------------------------------------------------------------------------------------------------------------------------------------|-------------------------------------------------------------------------------------------------------------------------------------------------|
| Population   | <ul style="list-style-type: none"><li>Adults (aged <math>\geq 18</math> years) with active PsA despite treatment with csDMARDs, NSAIDs, and/or previous anti-TNF therapy and/or previous biologic therapy</li><li>Subgroups of patients with PsA in psoriasis studies will be included, provided that all patients in the study were adults (aged <math>\geq 18</math> years) with active psoriasis despite topical treatment, phototherapy, and/or</li></ul> | <ul style="list-style-type: none"><li>Children</li><li>Participants experiencing active, ongoing inflammatory diseases other than PsA</li></ul> |
| Intervention | <ul style="list-style-type: none"><li>Secukinumab</li><li>Etanercept (Enbrel<sup>®</sup>)</li><li>Adalimumab (Humira<sup>®</sup>)</li><li>Infliximab (Remicade<sup>®</sup>)</li><li>Ustekinumab (Stelara<sup>®</sup>)</li><li>Golimumab (Simponi<sup>®</sup>)</li><li>Certolizumab (Cimzia<sup>®</sup>)</li><li>Apremilast (Otezla<sup>®</sup>)</li><li>Ixekizumab<sup>a</sup></li></ul>                                                                      | <ul style="list-style-type: none"><li>Nonbiologic treatments for PsA other than apremilast (e.g., csDMARDs)</li></ul>                           |
| Comparators  | <ul style="list-style-type: none"><li>Interventions listed above</li><li>Methotrexate</li><li>Placebo</li></ul>                                                                                                                                                                                                                                                                                                                                               |                                                                                                                                                 |

| Criteria                               | Inclusion criteria                                                                                                                                                                                                                                                                                                                                                                                                                                                                                                                                                                                                                                                                                                                                                                                                                                                                                                                                                                                                                                                                                                                                                                                                                                                                                                                                                                                                                                                                                                             | Exclusion criteria |
|----------------------------------------|--------------------------------------------------------------------------------------------------------------------------------------------------------------------------------------------------------------------------------------------------------------------------------------------------------------------------------------------------------------------------------------------------------------------------------------------------------------------------------------------------------------------------------------------------------------------------------------------------------------------------------------------------------------------------------------------------------------------------------------------------------------------------------------------------------------------------------------------------------------------------------------------------------------------------------------------------------------------------------------------------------------------------------------------------------------------------------------------------------------------------------------------------------------------------------------------------------------------------------------------------------------------------------------------------------------------------------------------------------------------------------------------------------------------------------------------------------------------------------------------------------------------------------|--------------------|
| Outcomes<br>(sift 2 only) <sup>b</sup> | <p data-bbox="464 259 719 293">Efficacy measurements</p> <ul data-bbox="464 327 975 1379" style="list-style-type: none"> <li data-bbox="464 327 975 416">• Proportion of patients achieving ACR 20, ACR 50 and ACR 70 responses</li> <li data-bbox="464 461 975 685">• Proportion of patients achieving PASI 50, PASI 75, and PASI 90 responses in the subgroup of patients who have skin involvement with PsA</li> <li data-bbox="464 730 584 763">• PsARC</li> <li data-bbox="464 797 831 831">• Response per the DAS28-CRP</li> <li data-bbox="464 875 975 1043">• HRQoL outcomes (HAQ-DI, SF-36, DLQI; change in HAQ conditional upon PsARC response will be captured)</li> <li data-bbox="464 1077 959 1111">• HRQoL assessments, including the EQ-5D</li> <li data-bbox="464 1155 975 1379">• Signs and symptoms of PsA (including swollen joint counts, tender joint counts, CRP levels, enthesitis and dactylitis scores, mTSS, and VdH score)</li> </ul> <p data-bbox="464 1480 959 1514">Safety outcomes reported at study end-point</p> <ul data-bbox="464 1547 975 1995" style="list-style-type: none"> <li data-bbox="464 1547 639 1581">• Overall AEs</li> <li data-bbox="464 1626 815 1659">• Discontinuations due to AEs</li> <li data-bbox="464 1704 975 1928">• Serious AEs (e.g., cardiovascular events, death, malignancies [melanoma and lymphoma] and serious infections [e.g., tuberculosis and herpes])</li> <li data-bbox="464 1973 975 2007">• Individual safety outcomes of interest may</li> </ul> |                    |

| Criteria     | Inclusion criteria                                                                                                                                                                                                                | Exclusion criteria                                                                                                                                                                                                                                                                                                                                                                                              |
|--------------|-----------------------------------------------------------------------------------------------------------------------------------------------------------------------------------------------------------------------------------|-----------------------------------------------------------------------------------------------------------------------------------------------------------------------------------------------------------------------------------------------------------------------------------------------------------------------------------------------------------------------------------------------------------------|
|              | include opportunistic infections,<br>neutropenia, malignancies, hypersensitivity,<br>and major adverse cardiac events                                                                                                             |                                                                                                                                                                                                                                                                                                                                                                                                                 |
| Study design | <ul style="list-style-type: none"> <li>• Randomized, controlled, prospective clinical trials, including phase 2 and phase 3</li> <li>• Systematic reviews, meta-analyses and pooled analyses (sift 1 only)<sup>c</sup></li> </ul> | <ul style="list-style-type: none"> <li>• Nonrandomized trials</li> <li>• Preclinical studies</li> <li>• Phase 1 studies</li> <li>• Long-term follow-up studies</li> <li>• Prospective observational studies</li> <li>• Prognostic studies</li> <li>• Retrospective studies</li> <li>• Case reports</li> <li>• Commentaries and letters</li> <li>• Consensus reports</li> <li>• Nonsystematic reviews</li> </ul> |

*ACR 20/50/70* 20%/50%/70% or greater improvement in the American College of Rheumatology response criteria, *AE* adverse event, *csDMARD* conventional synthetic disease-modifying antirheumatic drug, *CRP* C- reactive protein, *DAS28-CRP* 28-joint Disease Activity Score using CRP as acute phase reactant, *DLQI* Dermatology Life Quality Index, *DMARD* Disease-modifying Antirheumatic Drug, *EQ-5D* 5-Dimension EuroQoL questionnaire, *HAQ* Health Assessment Questionnaire, *HAQ-DI* health assessment questionnaire disability index, *HRQoL* health-related quality of life, *mTSS* modified total Sharp score, *NSAID* nonsteroidal anti-inflammatory drug, *PASI 50/75/90*, 50%/75%/90% or greater improvement in Psoriasis Area and Severity Index score, *PsA* psoriatic arthritis, *PsARC* Psoriatic Arthritis Response Criteria, *SF-36* 36-item Short-Form Health Survey, *SLR* Systematic Literature Review, *TNF* Tumor Necrosis Factor, *VdH* Van der Heijde

<sup>a</sup> Ixekizumab was included in the search terms, but because ixekizumab has not been approved for treatment, it was not considered in the results

<sup>b</sup> Studies were only screened for outcomes during the full-text review; at the title/abstract screening stage, any outcomes were permitted

<sup>c</sup> Systematic reviews and meta-analyses were included at the title/abstract screening stage and used for identification of any additional primary studies not identified through the database searches, but were excluded during the full-text review

**Figure S1** PRISMA flow chart. The rules for this SLR were set a priori (as defined in Table S1), yielding 29 trials. A second filter was then applied, i.e., studies that contain either adalimumab or secukinumab. *MAIC* Matching-Adjusted Indirect Comparison, *PRISMA* Preferred Reporting Items for Systematic Reviews and Meta-Analyses

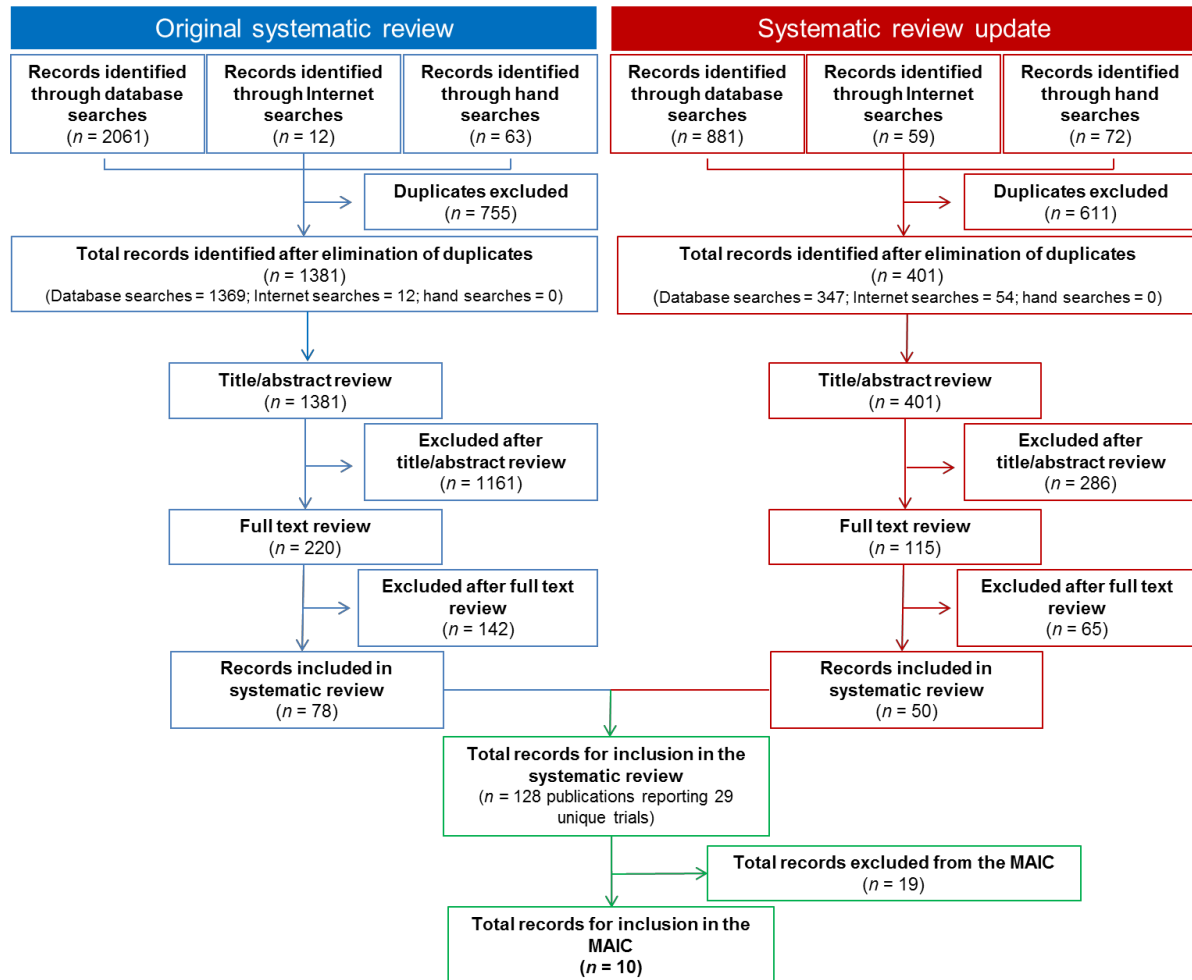

**Table S2** Trials identified by the SLR and the reasons for their inclusion/exclusion in this MAIC

| <b>Trial</b>        | <b>Intervention</b>                                       | <b>Comparator</b>                                                                                                              | <b>Population</b>                                                                                                                                                                                             | <b>Primary study reference</b> | <b>Secondary reference(s)</b>                             | <b>Study included in MAIC analysis?</b>                                                                 |
|---------------------|-----------------------------------------------------------|--------------------------------------------------------------------------------------------------------------------------------|---------------------------------------------------------------------------------------------------------------------------------------------------------------------------------------------------------------|--------------------------------|-----------------------------------------------------------|---------------------------------------------------------------------------------------------------------|
| ADEPT               | ADA 40 mg Q2W                                             | Placebo                                                                                                                        | 315 adults with moderately to severely active PsA, and a history of an inadequate response or intolerance to NSAIDs for PsA                                                                                   | Mease 2005 (15)                | Gladman 2007 (65)<br>Gladman 2007 (16)<br>Mease 2009 (17) | <b>Yes</b>                                                                                              |
| Behrens 2014        | ADA and methotrexate                                      | ADA                                                                                                                            | 1455 patients with active PsA                                                                                                                                                                                 | Behrens 2014 (24)              | None                                                      | <b>No</b> – observational study                                                                         |
| CLEAR (subanalysis) | SEC 300 mg s.c. at weeks 0, 1, 2, 3, then Q4W from week 4 | Ustekinumab 45 mg s.c. for Individuals ≤ 100 kg and 90 mg s.c. for individuals 100 kg at weeks 0 and 4, then Q12W from week 16 | CLEAR included 676 patients with moderate to severe psoriasis whose disease was inadequately controlled by topical treatment, phototherapy and/or previous systemic therapy. 123 patients had concomitant PsA | Gottlieb 2015 (66)             | None                                                      | <b>No</b> – included patients with moderate to severe psoriasis, of whom a subgroup had concomitant PsA |

| <b>Trial</b>             | <b>Intervention</b>                                                                 | <b>Comparator</b> | <b>Population</b>                                                                                                                                                                                     | <b>Primary study reference</b>           | <b>Secondary reference(s)</b>                                      | <b>Study included in MAIC analysis?</b>                                                                 |
|--------------------------|-------------------------------------------------------------------------------------|-------------------|-------------------------------------------------------------------------------------------------------------------------------------------------------------------------------------------------------|------------------------------------------|--------------------------------------------------------------------|---------------------------------------------------------------------------------------------------------|
| ERASURE<br>(subanalysis) | SEC 300 mg or<br>150 mg at weeks<br>0, 1, 2, 3, and 4,<br>then Q4W until<br>week 48 | Placebo           | ERASURE included patients with moderate to severe psoriasis whose disease was poorly controlled by topical treatment, phototherapy and/or previous systemic therapy. 171 patients had concomitant PsA | Gottlieb 2013 (67)<br>Gottlieb 2015 (66) | Blauvelt 2014 (68)<br>Gottlieb 2014 (69)<br>Philipp 2015 (70)      | <b>No</b> – included patients with moderate to severe psoriasis, of whom a subgroup had concomitant PsA |
| FIXTURE<br>(subanalysis) | SEC 300 mg or<br>150 mg QW for<br>4 weeks                                           | Placebo           | FIXTURE included patients with moderate to severe psoriasis whose disease was poorly controlled by topical treatment, phototherapy and/or previous systemic therapy. 196 patients had concomitant PsA | Gottlieb 2015 (66)                       | Gottlieb 2013 (71)<br>Philipp 2015 (70)<br>Sigurgeirsson 2014 (72) | <b>No</b> – included patients with moderate to severe psoriasis, of whom a subgroup had concomitant PsA |
| FUTURE 1                 | SEC 10 mg/kg i.v.<br>at weeks 0, 2,                                                 | Placebo           | 606 patients with PsA and an inadequate response or intolerance                                                                                                                                       | Mease 2015 (22)                          | Gottlieb 2014 (73)<br>Mease 2014 (74)                              | <b>No</b> – loading method (i.v.) not                                                                   |

| <b>Trial</b>     | <b>Intervention</b>                                                | <b>Comparator</b> | <b>Population</b>                                                                        | <b>Primary study reference</b> | <b>Secondary reference(s)</b>                                                                                                  | <b>Study included in MAIC analysis?</b>                                   |
|------------------|--------------------------------------------------------------------|-------------------|------------------------------------------------------------------------------------------|--------------------------------|--------------------------------------------------------------------------------------------------------------------------------|---------------------------------------------------------------------------|
|                  | and 4, then<br>150 mg or 75 mg<br>s.c. Q4W<br>thereafter           |                   | to NSAIDs                                                                                |                                | Mease 2015 (75)<br>Mease 2015 (76)<br>Strand 2014 (77)<br>van der Heijde 2014<br>(78)                                          | licensed                                                                  |
| FUTURE 2         | SEC 300 mg or<br>150 mg QW from<br>baseline to week<br>4, then Q4W | Placebo           | 298 patients with active PsA despite<br>treatment with NSAIDs, csDMARDs,<br>or anti-TNFs | McInnes 2015 (18)              | Gottlieb 2015 (79)<br>Gottlieb 2015 (80)<br>Kavanaugh 2015<br>(81)<br>McInnes 2014 (82)<br>Mease 2015 (83)<br>Rahman 2015 (84) | <b>Yes</b>                                                                |
| Genovese<br>2007 | ADA 40 mg Q2W                                                      | Placebo           | 102 adults with active PsA and an<br>inadequate response to csDMARDs                     | Genovese 2007 (85)             | None                                                                                                                           | <b>No</b> – excluded<br>because the<br>double-blind<br>period only lasted |

| Trial          | Intervention                       | Comparator | Population                  | Primary study reference | Secondary reference(s)                 | Study included in MAIC analysis?            |
|----------------|------------------------------------|------------|-----------------------------|-------------------------|----------------------------------------|---------------------------------------------|
|                |                                    |            |                             |                         |                                        | until week 12                               |
| McInnes 2014   | SEC 10 mg/kg i.v. at weeks 0 and 3 | Placebo    | 42 patients with active PsA | McInnes 2014 (23)       | McInnes 2012 (86)<br>McInnes 2012 (87) | No – phase 2 study                          |
| Van Kuijk 2009 | ADA for 4 weeks                    | Placebo    | 24 patients with active PsA | Van Kuijk 2009 (26)     | De Groot 2012 (88)                     | No – restricted to synovial biopsy analyses |

ADA adalimumab, DMARD disease-modifying antirheumatic drug, i.v. intravenously, MAIC Matching-Adjusted Indirect Comparison, NSAID nonsteroidal anti-inflammatory drug, PsA psoriatic arthritis, Q2W every 2 weeks, Q12W every 12 weeks, Q4W every 4 weeks, QW once weekly, s.c. subcutaneously, SEC secukinumab, SLR systematic literature review, TNF tumor necrosis factor



**Table S3** Logistic regression model for ACR 20 response at week 48 (FUTURE 2 study: full analysis set)

| Variable                                       | Category                    | Estimate (SE)         | OR (95% CI)                 | P value       |
|------------------------------------------------|-----------------------------|-----------------------|-----------------------------|---------------|
| Intercept                                      |                             | 0.541 (1.028)         |                             | 0.5983        |
| Age, years (estimated OR for a 10-unit change) |                             | -0.013 (0.010)        | 0.882 (0.722, 1.076)        | 0.2165        |
| Weight, kg (estimated OR for a 5-unit change)  |                             | -0.012 (0.006)        | 0.940 (0.883, 1.000)        | 0.0518        |
| Sex                                            | Female                      | -0.068 (0.269)        | 0.934 (0.551, 1.583)        | 0.8008        |
|                                                | Male                        | Ref                   |                             |               |
| <b>Anti-TNF status</b>                         | <b>Inadequate responder</b> | <b>-0.842 (0.249)</b> | <b>0.431 (0.265, 0.701)</b> | <b>0.0007</b> |
|                                                | Naïve                       | Ref                   |                             |               |
|                                                |                             |                       |                             |               |
| Methotrexate use at baseline                   | Yes                         | 0.287 (0.242)         | 1.333 (0.830, 2.141)        | 0.2344        |
|                                                | No                          | Ref                   |                             |               |
| Corticosteroid use at baseline                 | Yes                         | -0.189 (0.326)        | 0.827 (0.437, 1.568)        | 0.5612        |
|                                                | No                          | Ref                   |                             |               |
| Presence of dactylitis                         | Yes                         | 0.207 (0.260)         | 1.230 (0.739, 2.047)        | 0.4263        |
|                                                | No                          | Ref                   |                             |               |

| <b>Variable</b>                                        | <b>Category</b> | <b>Estimate (SE)</b> | <b>OR (95% CI)</b>   | <b>P value</b> |
|--------------------------------------------------------|-----------------|----------------------|----------------------|----------------|
| Presence of enthesitis                                 | Yes             | -0.518 (0.257)       | 0.596 (0.360, 0.985) | 0.0435         |
|                                                        | No              | Ref                  |                      |                |
| Psoriasis affecting ≥ 3% of BSA                        | Yes             | -0.070 (0.299)       | 0.933 (0.519, 1.677) | 0.8163         |
|                                                        | No              | Ref                  |                      |                |
| PASI total score at baseline                           |                 | 0.027 (0.016)        | 1.027 (0.995, 1.060) | 0.0978         |
| HAQ-DI score at baseline                               |                 | 0.428 (0.272)        | 1.535 (0.901, 2.614) | 0.1148         |
| FACIT-Fatigue score at baseline                        |                 | 0.027 (0.013)        | 1.027 (1.001, 1.055) | 0.0447         |
| Swollen 76-joint count at baseline                     |                 | 0.010 (0.015)        | 1.010 (0.980, 1.040) | 0.5157         |
| Tender 78-joint count at baseline                      |                 | -0.015 (0.009)       | 0.985 (0.967, 1.003) | 0.1008         |
| Patient's assessment of PsA pain intensity at baseline |                 | 0.012 (0.007)        | 1.012 (0.999, 1.025) | 0.0674         |
| CRP at baseline, mg/L                                  |                 | 0.003 (0.007)        | 1.003 (0.989, 1.016) | 0.6891         |
| PsA duration at baseline, years                        |                 | 0.007 (0.016)        | 1.007 (0.976, 1.039) | 0.6625         |

*ACR* American College of Rheumatology, *ACR 20* 20% improvement in the American College of Rheumatology response criteria, *BSA* body surface area, *CI* confidence interval, *CRP* C-reactive protein, *FACIT* Functional Assessment of Chronic Illness Therapy, *HAQ-DI* health assessment questionnaire disability index, *OR* odds ratio, *PASI* Psoriasis Area and Severity Index, *PsA* psoriatic arthritis, *SE* standard error, *TNF* tumor necrosis factor

Estimates (SE), 95% CI, and *P* values are from a logistic regression model with baseline factors including age, weight, sex, anti-TNF status, methotrexate use, corticosteroid use, presence of dactylitis, presence of enthesitis, psoriasis, PASI total score, HAQ-DI score, fatigue score, swollen joint count, tender joint count, pain assessment, CRP, and PsA duration

The model includes *N* = 362 observations. Missing ACR responders are considered as nonresponders

**Table S4** Logistic regression model for ACR 50 response at week 48 (FUTURE 2 study: full analysis set)

| Variable                                       | Category                    | Estimate (SE)         | OR (95% CI)                 | P value       |
|------------------------------------------------|-----------------------------|-----------------------|-----------------------------|---------------|
| Intercept                                      |                             | -0.445 (1.061)        |                             | 0.6750        |
| Age, years (estimated OR for a 10-unit change) |                             | -0.027 (0.011)        | 0.762 (0.619, 0.938)        | 0.0104        |
| Weight, kg (estimated OR for a 5-unit change)  |                             | -0.011 (0.007)        | 0.945 (0.885, 1.010)        | 0.0954        |
| Sex                                            | Female                      | -0.144 (0.275)        | 0.866 (0.505, 1.483)        | 0.5997        |
|                                                | Male                        | Ref                   |                             |               |
| <b>Anti-TNF status</b>                         | <b>Inadequate responder</b> | <b>-0.774 (0.270)</b> | <b>0.461 (0.271, 0.784)</b> | <b>0.0042</b> |
|                                                | Naïve                       | Ref                   |                             |               |
| Methotrexate use at baseline                   | Yes                         | 0.178 (0.247)         | 1.194 (0.735, 1.940)        | 0.4730        |
|                                                | No                          | Ref                   |                             |               |
| Corticosteroid use at baseline                 | Yes                         | 0.130 (0.333)         | 1.139 (0.593, 2.189)        | 0.6961        |
|                                                | No                          | Ref                   |                             |               |
| Presence of dactylitis                         | Yes                         | 0.360 (0.261)         | 1.434 (0.860, 2.390)        | 0.1671        |
|                                                | No                          | Ref                   |                             |               |

| Variable                                               | Category | Estimate (SE)  | OR (95% CI)          | P value |
|--------------------------------------------------------|----------|----------------|----------------------|---------|
| Presence of enthesitis                                 | Yes      | -0.418 (0.256) | 0.658 (0.398, 1.088) | 0.1026  |
|                                                        | No       | Ref            |                      |         |
| Psoriasis affecting ≥ 3% of BSA                        | Yes      | -0.120 (0.304) | 0.887 (0.489, 1.608) | 0.6925  |
|                                                        | No       | Ref            |                      |         |
| PASI total score at baseline                           |          | 0.031 (0.015)  | 1.031 (1.000, 1.063) | 0.0472  |
| HAQ-DI score at baseline                               |          | 0.565 (0.283)  | 1.760 (1.011, 3.062) | 0.0456  |
| FACIT-Fatigue score at baseline                        |          | 0.044 (0.014)  | 1.045 (1.016, 1.074) | 0.0021  |
| Swollen 76-joint count at baseline                     |          | 0.018 (0.016)  | 1.018 (0.986, 1.051) | 0.2789  |
| Tender 78-joint count at baseline                      |          | -0.013 (0.010) | 0.987 (0.967, 1.007) | 0.2000  |
| Patient's assessment of PsA pain intensity at baseline |          | 0.008 (0.007)  | 1.008 (0.994, 1.021) | 0.2567  |
| CRP at baseline, mg/L                                  |          | 0.004 (0.007)  | 1.004 (0.991, 1.017) | 0.5274  |
| PsA duration at baseline, years                        |          | 0.005 (0.017)  | 1.005 (0.973, 1.039) | 0.7448  |

*ACR* American College of Rheumatology, *ACR 50* 50% improvement in the American College of Rheumatology response criteria, *BSA* body surface area, *CI* confidence interval, *CRP* C-reactive protein, *FACIT* Functional Assessment of Chronic Illness Therapy, *HAQ-DI* health assessment questionnaire disability index, *OR* odds ratio, *PASI* Psoriasis Area and Severity Index, *PsA* psoriatic arthritis, *SE* standard error, *TNF* tumor necrosis factor

Estimates (SE), 95% CI, and *P* values are from a logistic regression model with baseline factors including age, weight, sex, anti-TNF status, methotrexate use, corticosteroid use, presence of dactylitis, presence of enthesitis, psoriasis, PASI total score, HAQ-DI score, fatigue score, swollen joint count, tender joint count, pain assessment, CRP and PsA disease duration

The model includes *N* = 362 observations. Missing ACR responders are considered as nonresponders

**Table S5** Logistic regression model for ACR 70 response at week 48 (FUTURE 2 study: full analysis set)

| Variable                                       | Category                    | Estimate (SE)         | OR (95% CI)                 | P value       |
|------------------------------------------------|-----------------------------|-----------------------|-----------------------------|---------------|
| Intercept                                      |                             | 1.147 (1.229)         |                             | 0.3508        |
| Age, years (estimated OR for a 10-unit change) |                             | -0.027 (0.012)        | 0.766 (0.601, 0.977)        | 0.0315        |
| Weight, kg (estimated OR for a 5-unit change)  |                             | -0.016 (0.008)        | 0.925 (0.855, 1.001)        | 0.0516        |
| Sex                                            | Female                      | -0.279 (0.320)        | 0.756 (0.404, 1.416)        | 0.3830        |
|                                                | Male                        | Ref                   |                             |               |
| <b>Anti-TNF status</b>                         | <b>Inadequate responder</b> | <b>-0.991 (0.345)</b> | <b>0.371 (0.189, 0.729)</b> | <b>0.0040</b> |
|                                                | Naïve                       | Ref                   |                             |               |
| Methotrexate use at baseline                   | Yes                         | -0.033 (0.289)        | 0.967 (0.548, 1.706)        | 0.9085        |
|                                                | No                          | Ref                   |                             |               |
| Corticosteroid use at baseline                 | Yes                         | 0.351 (0.383)         | 1.420 (0.670, 3.009)        | 0.3599        |
|                                                | No                          | Ref                   |                             |               |
| Presence of dactylitis                         | Yes                         | 0.198 (0.302)         | 1.219 (0.674, 2.205)        | 0.5123        |
|                                                | No                          | Ref                   |                             |               |

| Variable                                               | Category | Estimate (SE)  | OR (95% CI)          | P value |
|--------------------------------------------------------|----------|----------------|----------------------|---------|
| Presence of enthesitis                                 | Yes      | 0.010 (0.298)  | 1.010 (0.563, 1.813) | 0.9738  |
|                                                        | No       | Ref            |                      |         |
| Psoriasis affecting ≥ 3% of BSA                        | Yes      | -0.388 (0.353) | 0.678 (0.340, 1.354) | 0.2708  |
|                                                        | No       | Ref            |                      |         |
| PASI total score at baseline                           |          | 0.031 (0.017)  | 1.031 (0.997, 1.066) | 0.0707  |
| HAQ-DI score at baseline                               |          | 0.473 (0.332)  | 1.605 (0.838, 3.075) | 0.1536  |
| FACIT-Fatigue score at baseline                        |          | 0.010 (0.016)  | 1.010 (0.978, 1.043) | 0.5313  |
| Swollen 76-joint count at baseline                     |          | 0.011 (0.020)  | 1.011 (0.972, 1.052) | 0.5853  |
| Tender 78-joint count at baseline                      |          | -0.022 (0.013) | 0.978 (0.953, 1.004) | 0.0920  |
| Patient's assessment of PsA pain intensity at baseline |          | -0.003 (0.008) | 0.997 (0.982, 1.012) | 0.6993  |
| CRP at baseline, mg/L                                  |          | 0.003 (0.007)  | 1.003 (0.989, 1.017) | 0.6774  |
| PsA duration at baseline, years                        |          | -0.006 (0.021) | 0.994 (0.955, 1.035) | 0.7728  |

ACR American College of Rheumatology, ACR 70 70% improvement in the American College of Rheumatology response criteria, BSA body surface area, CI confidence interval, CRP C-reactive protein, FACIT Functional Assessment of Chronic Illness Therapy, HAQ-DI health assessment questionnaire disability index, OR odds ratio, PASI Psoriasis Area and Severity Index, PsA psoriatic arthritis, SE standard error, TNF tumor necrosis factor

Estimates (SE), 95% CI, and P values are from a logistic regression model with baseline factors including age, weight, sex, anti-TNF status, methotrexate use, corticosteroid use, presence of dactylitis, presence of enthesitis, psoriasis, PASI total score, HAQ-DI score, fatigue score, swollen joint count, tender joint count, pain assessment, CRP, and PsA duration

The model includes  $N = 362$  observations. Missing ACR responders are considered as nonresponders

**Table S6** Baseline characteristics before and after matching in the sensitivity analysis

|                       | Before matching        |                      |                            |                            |                     | After matching                       |                          |                          |                       |                          |
|-----------------------|------------------------|----------------------|----------------------------|----------------------------|---------------------|--------------------------------------|--------------------------|--------------------------|-----------------------|--------------------------|
|                       | ADEPT                  |                      | FUTURE 2                   |                            |                     | FUTURE 2                             |                          |                          |                       |                          |
|                       | ADA 40 mg<br>(n = 151) | Placebo<br>(n = 162) | SEC<br>150 mg<br>(n = 100) | SEC<br>300 mg<br>(n = 100) | Placebo<br>(n = 98) | Pooled SEC <sup>a</sup><br>(n = 299) | SEC 150 mg<br>(ESS = 15) | SEC 300 mg<br>(ESS = 25) | Placebo<br>(ESS = 20) | Pooled SEC<br>(ESS = 67) |
| Demographics          |                        |                      |                            |                            |                     |                                      |                          |                          |                       |                          |
| Age, years, mean (SD) | 48.6 (12.5)            | 49.2 (11.1)          | 46.5 (11.7)                | 46.9 (12.6)                | 49.9 (12.5)         | 47.3 (11.9)                          | 47.8 (6.6)               | 50.3 (8.2)               | 49.2 (7.1)            | 48.6 (7.2)               |
|                       |                        |                      | <i>P</i> = 0.1826          | <i>P</i> = 0.2940          |                     | <i>P</i> = 0.2826                    | <i>P</i> = 0.8075        | <i>P</i> = 0.5126        |                       | <i>P</i> = 1.000         |
| Weight, kg, mean (SD) | 86.0 (20.6)            | 85.5 (16.5)          | 91.2 (19.8)                | 85.4 (18.4)                | 86.2 (19.8)         | 87.4 (19.7)                          | 87.1 (10.0)              | 87.2 (10.7)              | 85.5 (9.4)            | 86.0 (10.7)              |
|                       |                        |                      | <i>P</i> = 0.0479          | <i>P</i> = 0.8140          |                     | <i>P</i> = 0.4837                    | <i>P</i> = 0.8386        | <i>P</i> = 0.7764        |                       | <i>P</i> = 1.000         |
| Female, <i>n</i> (%)  | 66 (43.7)              | 73 (45.1)            | 45 (45.0)                  | 49 (49.0)                  | 59 (60.2)           | 146 (48.8)                           | (40.3) <sup>b</sup>      | (38.5) <sup>b</sup>      | (45.1) <sup>b</sup>   | (43.7) <sup>b</sup>      |
|                       |                        |                      | <i>P</i> = 0.1826          | <i>P</i> = 0.4101          |                     | <i>P</i> = 0.3041                    | <i>P</i> = 0.7822        | <i>P</i> = 0.7288        |                       | <i>P</i> = 1.000         |
| White, <i>n</i> (%)   | 147 (97.4)             | 152 (93.8)           | 90 (90.0)                  | 96 (96.0)                  | 94 (95.9)           | 276 (92.3)                           | (96.6) <sup>b</sup>      | (99.3) <sup>b</sup>      | (93.8) <sup>b</sup>   | (97.4) <sup>b</sup>      |
|                       |                        |                      | <i>P</i> = 0.0130          | <i>P</i> = 0.5508          |                     | <i>P</i> = 0.0334                    | <i>P</i> = 0.3852        | <i>P</i> = 0.4104        |                       | <i>P</i> = 1.000         |

| Disease characteristics              |                         |             |                   |                   |             |                   |                     |                     |                     |                     |
|--------------------------------------|-------------------------|-------------|-------------------|-------------------|-------------|-------------------|---------------------|---------------------|---------------------|---------------------|
| Psoriasis affecting $\geq 3\%$       | 70 (46.4)               | 70 (43.2)   | 58 (58.0)         | 41 (41.0)         | 43 (43.9)   | 149 (49.8)        | (54.2) <sup>b</sup> | (35.1) <sup>b</sup> | (43.2) <sup>b</sup> | (46.4) <sup>b</sup> |
| BSA, <i>n</i> (%)                    |                         |             | <i>P</i> = 0.0709 | <i>P</i> = 0.4028 |             | <i>P</i> = 0.4862 | <i>P</i> = 0.6057   | <i>P</i> = 0.3348   |                     | <i>P</i> = 1.000    |
| PASI score, mean (SD) <sup>c</sup>   | 7.4 (6.0)               | 8.3 (7.2)   | 16.2 (14.3)       | 11.9 (8.4)        | 11.5 (8.3)  | 13.6 (11.6)       | 7.9 (2.0)           | 7.8 (3.0)           | 8.3 (4.2)           | 7.4 (2.3)           |
|                                      |                         |             | <i>P</i> < 0.0001 | <i>P</i> = 0.0014 |             | <i>P</i> < 0.0001 | <i>P</i> = 0.8056   | <i>P</i> = 0.8089   |                     | <i>P</i> = 1.000    |
| HAQ-DI score, mean (SD)              | 1.0 (0.6)               | 1.0 (0.7)   | 1.2 (0.6)         | 1.3 (0.6)         | 1.2 (0.7)   | 1.2 (0.6)         | 0.9 (0.3)           | 1.1 (0.4)           | 1.0 (0.4)           | 1.0 (0.3)           |
|                                      |                         |             | <i>P</i> = 0.0103 | <i>P</i> = 0.0001 |             | <i>P</i> = 0.0009 | <i>P</i> = 0.5254   | <i>P</i> = 0.4229   |                     | <i>P</i> = 1.000    |
| Presence of dactylitis, <i>n</i> (%) | 117 (37.4) <sup>d</sup> |             | 32 (32.0)         | 46 (46.0)         | 27 (27.6)   | 111 (37.1)        | (24.7) <sup>b</sup> | (44.6) <sup>b</sup> | (37.4)              | (37.4) <sup>b</sup> |
|                                      |                         |             | <i>P</i> = 0.4084 | <i>P</i> = 0.1592 |             | <i>P</i> = 0.9938 | <i>P</i> = 0.4231   | <i>P</i> = 0.5096   |                     | <i>P</i> = 1.000    |
| Presence of enthesitis, <i>n</i> (%) | 118 (37.7) <sup>d</sup> |             | 64 (64.0)         | 56 (56.0)         | 65 (66.3)   | 188 (62.9)        | (35.0) <sup>b</sup> | (34.6) <sup>b</sup> | (37.7)              | (37.7) <sup>b</sup> |
|                                      |                         |             | <i>P</i> < 0.0001 | <i>P</i> = 0.0044 |             | <i>P</i> < 0.0001 | <i>P</i> = 0.7360   | <i>P</i> = 0.8672   |                     | <i>P</i> = 1.000    |
| PsA duration, years, mean (SD)       | 9.8 (8.3)               | 9.2 (8.7)   | 6.5 (8.2)         | 7.4 (7.5)         | 7.3 (7.8)   | 6.8 (7.6)         | 12.1 (8.2)          | 8.4 (5.6)           | 9.2 (3.9)           | 9.8 (6.6)           |
|                                      |                         |             |                   |                   |             |                   | <i>P</i> = 0.3070   | <i>P</i> = 0.4177   |                     | <i>P</i> = 1.000    |
| SJC, mean (SD)                       | 14.3 (12.2)             | 14.3 (11.1) | 11.9 (10.0)       | 11.2 (7.8)        | 12.1 (10.6) | 11.3 (9.0)        | 17.4 (8.5)          | 11.0 (3.5)          | 14.3 (5.6)          | 14.3 (6.8)          |
|                                      |                         |             |                   |                   |             |                   | <i>P</i> = 0.3385   | <i>P</i> = 0.1819   |                     | <i>P</i> = 1.000    |
| CRP, mg/dL, mean (SD)                | 1.4 (2.1)               | 1.4 (1.7)   | 1.4 (2.7)         | 1.1 (1.5)         | 0.8 (1.3)   | 1.1 (1.9)         | 1.1 (1.0)           | 1.9 (1.6)           | 1.4 (1.1)           | 1.4 (1.2)           |
|                                      |                         |             |                   |                   |             |                   | <i>P</i> = 0.5858   | <i>P</i> = 0.2575   |                     | <i>P</i> = 1.000    |



| Previous treatment                             |             |             |                   |                   |             |                   |                     |                     |                     |                     |
|------------------------------------------------|-------------|-------------|-------------------|-------------------|-------------|-------------------|---------------------|---------------------|---------------------|---------------------|
| Methotrexate use, <i>n</i> (%)                 | 77 (51.0)   | 81 (50.0)   | 46 (46.0)         | 45 (45.0)         | 52 (53.1)   | 138 (46.2)        | (54.8) <sup>b</sup> | (49.5) <sup>b</sup> | (50.0) <sup>b</sup> | (51.0) <sup>b</sup> |
|                                                |             |             | <i>P</i> = 0.4385 | <i>P</i> = 0.3523 |             | <i>P</i> = 0.3318 | <i>P</i> = 0.8627   | <i>P</i> = 0.7816   |                     | <i>P</i> = 1.000    |
| Anti-TNF-naïve, <i>n</i> (%)                   | 151 (100)   | 162 (100)   | 63 (63.0)         | 67 (67.0)         | 63 (64.3)   | 195 (65.2)        | 15 (100)            | 25 (100)            | 20 (100)            | 67 (100)            |
|                                                |             |             | <i>P</i> < 0.0001 | <i>P</i> < 0.0001 |             | <i>P</i> < 0.0001 | <i>P</i> = 1.000    | <i>P</i> = 1.000    |                     | <i>P</i> = 1.000    |
| Variables not used in the matching             |             |             |                   |                   |             |                   |                     |                     |                     |                     |
| TJC (SD)                                       | 23.9 (17.3) | 25.8 (18.0) | 24.1 (19.4)       | 20.2 (13.3)       | 23.4 (19.0) | 22.1 (16.5)       | 22.0 (10.4)         | 16.0 (5.2)          | 24.2 (10.8)         | 20.4 (8.3)          |
| SF-36 PCS, mean (SD)                           | 33.2 (9.9)  | 33.3 (9.8)  | 36.1 (8.1)        | 36.9 (8.0)        | 37.4 (8.8)  | 36.4 (8.1)        | 40.1 (3.7)          | 38.8 (4.6)          | 39.4 (5.3)          | 38.9 (4.0)          |
| SF-36 MCS, mean (SD)                           | 48.1 (10.2) | 46.6 (12.2) | 40.6 (11.5)       | 43.6 (12.1)       | 44.0 (10.7) | 42.7 (11.7)       | 48.2 (7.1)          | 47.8 (7.1)          | 49.3 (4.0)          | 46.7 (6.6)          |
| PGA (SD)                                       | 47.1 (23.2) | 48.1 (21.2) | 62.0 (19.5)       | 60.7 (18.9)       | 57.6 (19.8) | 60.6 (19.2)       | 45.6 (11.4)         | 60.0 (11.0)         | 51.6 (10.4)         | 53.3 (11.7)         |
| Patient's assessment of<br>PsA pain, mean (SD) | 51.1 (21.4) | 48.8 (21.7) | 58.9 (19.8)       | 57.7 (19.0)       | 55.4 (22.1) | 57.8 (19.9)       | 45.1 (12.0)         | 54.4 (9.9)          | 57.4 (11.7)         | 51.5 (11.6)         |
| FACIT-Fatigue score, mean (SD)                 | 30.8 (12.1) | 30.8 (12.2) | 26.6 (11.6)       | 28.6 (12.6)       | 29.2 (11.8) | 28.0 (11.6)       | 36.2 (6.1)          | 34.3 (7.5)          | 34.5 (6.6)          | 33.2 (6.7)          |

ADA adalimumab, BSA body surface area, CRP C-reactive protein, ESS effective sample size, FACIT Functional Assessment of Chronic Illness Therapy, HAQ-DI health assessment questionnaire disability index, PASI Psoriasis Area and Severity Index, PsA psoriatic arthritis, SD standard deviation, SEC secukinumab, SF-36 MCS 36-item Short-Form Health Survey – Mental Component Summary, SF-36 PCS 36-item Short-Form Health Survey – Physical Component Summary, SJC swollen joint count, TJC tender joint count, TNF tumor necrosis factor

All *P* values were calculated for secukinumab versus adalimumab using t-test for continuous variables and Chi-squared test for dichotomous variables

<sup>a</sup> Pooled SEC 75 mg ( $n = 99$ ), 150 mg ( $n = 100$ ), and 300 mg ( $n = 100$ ) matched to ADA arm of ADEPT

<sup>b</sup> Integer population ( $n$ ) values not available due to calculation of pooled SEC ESS using the equation:  $\frac{(\sum_{i=1}^n \omega_i)^2}{\sum_{i=1}^n \omega_i^2}$

<sup>c</sup> PASI data were collected only for patients with psoriasis affecting  $\geq 3\%$  BSA

<sup>d</sup> Percentages of patients with dactylitis and enthesitis are presented for the entire ADEPT study (pooled active treatment and placebo arms)

**Fig. S2** Calculating relative risks and odds ratios

*Relative risk*

Relative risk (RR) is defined as the probability of an event in the treatment group ( $a / (a + b)$ ) divided by the probability of the same event occurring in the comparator group ( $c / (c + d)$ ). We can estimate it as follows:

$$RR = \frac{\frac{a}{a+b}}{\frac{c}{c+d}}$$

RRs were transformed by taking the natural logarithm and assuming that log relative risk follows a normal distribution. The variance of the log RR can be calculated as follows:

$$\text{Var}(\ln(RR)) = \frac{1}{a} + \frac{1}{a+b} + \frac{1}{c} + \frac{1}{c+d}.$$

*Odds ratio*

An odds ratio (OR) is defined as the ratio of the odds of an event occurring in one group to the odds of it occurring in another group. An OR above 1 would constitute an improvement relative to the comparator group. ORs were calculated as follows:

$$OR = \frac{ad}{bc}$$

The variance of the log odds ratio was estimated as follows:

$$\text{Var}(\log(OR)) = \frac{1}{a} + \frac{1}{b} + \frac{1}{c} + \frac{1}{d}$$

**Table S7** Comparison of relative risks and odds ratios in the principal analysis

| Relative risk (SEC vs ADA)                     |                         |              | Odds ratio (SEC vs ADA)                        |                         |              |
|------------------------------------------------|-------------------------|--------------|------------------------------------------------|-------------------------|--------------|
| ADA 40 mg, <i>n</i> = 151; PBO, <i>n</i> = 162 |                         |              | ADA 40 mg, <i>n</i> = 151; PBO, <i>n</i> = 162 |                         |              |
| SEC 150 mg, ESS = 36; PBO, ESS = 27            |                         |              | SEC 150 mg, ESS = 36; PBO, ESS = 27            |                         |              |
| SEC 300 mg, ESS = 38; PBO, ESS = 27            |                         |              | SEC 300 mg, ESS = 38; PBO, ESS = 27            |                         |              |
| ACR 20                                         | ACR 50                  | ACR 70       | ACR 20                                         | ACR 50                  | ACR 70       |
| Week 12 placebo-adjusted (SEC 150 mg)          |                         |              |                                                |                         |              |
| 0.69                                           | 0.91                    | 0.68         | 1.02                                           | 0.93                    | 0.70         |
| (0.34, 1.43)                                   | (0.23, 3.60)            | (0.07, 6.22) | (0.32, 3.24)                                   | (0.20, 4.37)            | (0.07, 7.04) |
| Week 12 placebo-adjusted (SEC 300 mg)          |                         |              |                                                |                         |              |
| 0.61                                           | 0.97                    | 0.50         | 0.65                                           | 1.03                    | 0.47         |
| (0.29, 1.27)                                   | (0.25, 3.79)            | (0.05, 4.93) | (0.20, 2.08)                                   | (0.22, 4.78)            | (0.04, 5.23) |
| Week 16 (SEC 150 mg)                           |                         |              |                                                |                         |              |
| <b>1.34</b>                                    | <b>1.54</b>             | 0.90         | <b>2.32</b>                                    | 2.09                    | 0.88         |
| <b>(1.05, 1.70)</b>                            | <b>(1.03, 2.30)</b>     | (0.43, 1.92) | <b>(1.03, 5.25)</b>                            | (1.00, 4.36)            | (0.35, 2.23) |
| <b><i>P</i> = 0.017</b>                        | <b><i>P</i> = 0.033</b> |              | <b><i>P</i> = 0.043</b>                        |                         |              |
| Week 16 (SEC 300 mg)                           |                         |              |                                                |                         |              |
| 1.18                                           | <b>1.54</b>             | 0.91         | 1.51                                           | <b>2.09</b>             | 0.89         |
| (0.90, 1.54)                                   | <b>(1.04, 2.29)</b>     | (0.44, 1.89) | (0.72, 3.18)                                   | <b>(1.02, 4.31)</b>     | (0.36, 2.20) |
|                                                | <b><i>P</i> = 0.030</b> |              |                                                | <b><i>P</i> = 0.045</b> |              |
| Week 24 (SEC 150 mg)                           |                         |              |                                                |                         |              |
| <b>1.42</b>                                    | <b>1.50</b>             | 1.59         | <b>3.21</b>                                    | <b>2.20</b>             | 1.94         |
| <b>(1.15, 1.75)</b>                            | <b>(1.07, 2.10)</b>     | (0.95, 2.67) | <b>(1.32, 7.84)</b>                            | <b>(1.05, 4.62)</b>     | (0.90, 4.22) |
| <b><i>P</i> = 0.001</b>                        | <b><i>P</i> = 0.019</b> |              | <b><i>P</i> = 0.010</b>                        | <b><i>P</i> = 0.036</b> |              |
| Week 24 (SEC 300 mg)                           |                         |              |                                                |                         |              |
| <b>1.27</b>                                    | 1.05                    | 0.99         | 1.99                                           | 1.09                    | 0.99         |
| <b>(1.00, 1.62)</b>                            | (0.69, 1.62)            | (0.52, 1.90) | (0.91, 4.36)                                   | (0.53, 2.25)            | (0.43, 2.31) |
| <b><i>P</i> = 0.048</b>                        |                         |              |                                                |                         |              |

---

|                      |                     |              |                     |              |              |
|----------------------|---------------------|--------------|---------------------|--------------|--------------|
| Week 48 (SEC 150 mg) |                     |              |                     |              |              |
| <b>1.41</b>          | 1.31                | 1.09         | <b>3.04</b>         | 1.72         | 1.13         |
| <b>(1.14, 1.76)</b>  | (0.93, 1.83)        | (0.64, 1.85) | <b>(1.27, 7.27)</b> | (0.82, 3.58) | (0.52, 2.46) |
| <b>P = 0.002</b>     |                     |              | <b>P = 0.013</b>    |              |              |
| Week 48 (SEC 300 mg) |                     |              |                     |              |              |
| <b>1.31</b>          | <b>1.41</b>         | 1.44         | 2.16                | 2.05         | 1.77         |
| <b>(1.03, 1.66)</b>  | <b>(1.03, 1.92)</b> | (0.93, 2.24) | (0.98, 4.75)        | (0.99, 4.25) | (0.85, 3.68) |
| <b>P = 0.027</b>     | <b>P = 0.032</b>    |              |                     |              |              |

---

ACR 20/50/70 20%/50%/70% improvement in the American College of Rheumatology response criteria, ADA adalimumab, SEC secukinumab

Data in brackets are 95% confidence intervals

P values (two-sided, bold when significant, i.e.,  $P < 0.05$ ) were derived from relative risk and odds ratios values using the Z-statistic

**Table S8** Principal and sensitivity analyses using updated statistical methodology

| Principal analysis (SEC vs ADA) ADA            |                         |                         | Sensitivity analysis (SEC vs ADA)              |                                     |                  |
|------------------------------------------------|-------------------------|-------------------------|------------------------------------------------|-------------------------------------|------------------|
| 40 mg, <i>n</i> = 151; PBO, <i>n</i> = 162 SEC |                         |                         | ADA 40 mg, <i>n</i> = 151; PBO, <i>n</i> = 162 |                                     |                  |
| 150 mg, ESS = 36; PBO, ESS = 27 SEC            |                         |                         | SEC 150 mg, ESS = 15; PBO, ESS = 20            |                                     |                  |
| 300 mg, ESS = 38; PBO, ESS = 27                |                         |                         | SEC 300 mg, ESS = 25; PBO, ESS = 20            |                                     |                  |
| ACR 20                                         | ACR 50                  | ACR 70                  | ACR 20                                         | ACR 50                              | ACR 70           |
| Week 12 placebo-adjusted (SEC 150 mg)          |                         |                         |                                                |                                     |                  |
| 0.69                                           | 0.91                    | 0.68                    | 1.06                                           | <b>10.44</b>                        | 5.99             |
| (0.34, 1.43)                                   | (0.23, 3.60)            | (0.07, 6.22)            | (0.39, 2.92)                                   | <b>(1.80, 60.56)</b>                | (0.56, 63.79)    |
| <i>P</i> = 0.321                               | <i>P</i> = 0.893        | <i>P</i> = 0.730        | <i>P</i> = 0.909                               | <b><i>P</i> = 0.009</b>             | <i>P</i> = 0.138 |
| Week 12 placebo-adjusted (SEC 300 mg)          |                         |                         |                                                |                                     |                  |
| 0.61                                           | 0.97                    | 0.50                    | 0.94                                           | <b>16.01</b>                        | 6.85             |
| (0.29, 1.27)                                   | (0.25, 3.79)            | (0.05, 4.93)            | (0.34, 2.61)                                   | <b>(2.95, 86.84)</b>                | (0.64, 73.92)    |
| <i>P</i> = 0.188                               | <i>P</i> = 0.962        | <i>P</i> = 0.550        | <i>P</i> = 0.913                               | <b><i>P</i> = 0.001<sup>b</sup></b> | <i>P</i> = 0.113 |
| Week 16 (SEC 150 mg)                           |                         |                         |                                                |                                     |                  |
| <b>1.34</b>                                    | <b>1.54</b>             | 0.90                    | <b>1.44</b>                                    | <b>1.67</b>                         | 0.91             |
| <b>(1.05, 1.70)</b>                            | <b>(1.03, 2.30)</b>     | (0.43, 1.92)            | <b>(1.08, 1.92)</b>                            | <b>(0.99, 2.80)</b>                 | (0.30, 2.73)     |
| <b><i>P</i> = 0.017</b>                        | <b><i>P</i> = 0.033</b> | <i>P</i> = 0.790        | <b><i>P</i> = 0.014</b>                        | <b><i>P</i> = 0.055</b>             | <i>P</i> = 0.861 |
| Week 16 (SEC 300 mg)                           |                         |                         |                                                |                                     |                  |
| 1.18                                           | <b>1.54</b>             | 0.91                    | <b>1.35</b>                                    | <b>1.63</b>                         | 0.92             |
| (0.90, 1.54)                                   | <b>(1.04, 2.29)</b>     | (0.44, 1.89)            | <b>(1.03, 1.76)</b>                            | <b>(1.05, 2.52)</b>                 | (0.39, 2.20)     |
| <i>P</i> = 0.239                               | <b><i>P</i> = 0.030</b> | <i>P</i> = 0.798        | <b><i>P</i> = 0.030</b>                        | <b><i>P</i> = 0.029</b>             | <i>P</i> = 0.857 |
| Week 24 (SEC 150 mg)                           |                         |                         |                                                |                                     |                  |
| <b>1.42</b>                                    | <b>1.50</b>             | <b>1.59</b>             | <b>1.46</b>                                    | <b>1.52</b>                         | 1.54             |
| <b>(1.15, 1.75)</b>                            | <b>(1.07, 2.10)</b>     | <b>(0.95, 2.67)</b>     | <b>(1.12, 1.91)</b>                            | <b>(0.96, 2.42)</b>                 | (0.74, 3.23)     |
| <b><i>P</i> = 0.001<sup>a</sup></b>            | <b><i>P</i> = 0.019</b> | <b><i>P</i> = 0.076</b> | <b><i>P</i> = 0.005</b>                        | <b><i>P</i> = 0.074</b>             | <i>P</i> = 0.249 |

Week 24 (SEC 300 mg)

|                     |              |              |                     |              |              |
|---------------------|--------------|--------------|---------------------|--------------|--------------|
| <b>1.27</b>         | 1.05         | 0.99         | <b>1.40</b>         | 1.08         | 1.00         |
| <b>(1.00, 1.62)</b> | (0.69, 1.62) | (0.52, 1.90) | <b>(1.10, 1.78)</b> | (0.66, 1.79) | (0.47, 2.17) |
| <b>P = 0.048</b>    | P = 0.810    | P = 0.983    | <b>P = 0.006</b>    | P = 0.751    | P = 0.991    |

Week 48 (SEC 150 mg)

|                     |              |              |                     |                     |              |
|---------------------|--------------|--------------|---------------------|---------------------|--------------|
| <b>1.41</b>         | 1.31         | 1.09         | <b>1.41</b>         | <b>1.55</b>         | 1.29         |
| <b>(1.14, 1.76)</b> | (0.93, 1.83) | (0.64, 1.85) | <b>(1.05, 1.89)</b> | <b>(1.04, 2.30)</b> | (0.65, 2.56) |
| <b>P = 0.002</b>    | P = 0.118    | P = 0.761    | <b>P = 0.022</b>    | <b>P = 0.029</b>    | P = 0.463    |

Week 48 (SEC 300 mg)

|                     |                     |              |                     |                                 |                     |
|---------------------|---------------------|--------------|---------------------|---------------------------------|---------------------|
| <b>1.31</b>         | <b>1.41</b>         | 1.44         | <b>1.45</b>         | <b>1.66</b>                     | <b>1.68</b>         |
| <b>(1.03, 1.66)</b> | <b>(1.03, 1.92)</b> | (0.93, 2.24) | <b>(1.15, 1.83)</b> | <b>(1.23, 2.24)</b>             | <b>(1.05, 2.66)</b> |
| <b>P = 0.027</b>    | <b>P = 0.032</b>    | P = 0.105    | <b>P = 0.002</b>    | <b>P &lt; 0.001<sup>c</sup></b> | <b>P = 0.029</b>    |

ACR 20/50/70 20%/50%/70% improvement in the American College of Rheumatology response

criteria, ADA adalimumab, RR relative risk, SEC secukinumab

Data are RR (95% confidence interval). We avoid strict thresholds when interpreting statistical *P* values, as per the American Statistical Association definition (7 March 2016) (40) but loosely interpret *P* values (two-sided) between 0.1 and 0.001 as increasing evidence (weak to moderate) and *P* values (two-sided) < 0.001 as strong evidence (42). All *P* values (two-sided) are shown. Bold *P* value text cells denote all data where 0.1 > *P* < 0.001 (Higher outcomes for SEC compared with ADA), dashed border when evidence is weak–moderate (*P* at or below 0.01), full border when moderate (approaching 0.001). No values crossed the *P* < 0.001 threshold indicative for “strong” evidence, although several data points (below) were directly at this point and can be considered moderate–strong evidence. No observations were made to support higher outcomes for ADA compared with SEC using this methodology

<sup>a</sup> Actual value, *P* = 0.0011

<sup>b</sup> Actual value, *P* = 0.0013

<sup>c</sup> Actual value, *P* = 0.0010

**Table S9** Sensitivity analysis: patient-reported outcome comparisons (LOCF)

|                                    | Week 12, placebo-adjusted                           |                                          |                                                           | Week 24                    |                                                           |                                                           | Week 48                              |                                                           |                                                           |
|------------------------------------|-----------------------------------------------------|------------------------------------------|-----------------------------------------------------------|----------------------------|-----------------------------------------------------------|-----------------------------------------------------------|--------------------------------------|-----------------------------------------------------------|-----------------------------------------------------------|
|                                    | ADA                                                 | SEC                                      | SEC                                                       | ADA                        | SEC                                                       | SEC                                                       | ADA                                  | SEC                                                       | SEC                                                       |
|                                    | 40 mg<br>(ADA, <i>n</i> = 151; PBO, <i>n</i> = 162) | 150 mg<br>(SEC, ESS = 15; PBO, ESS = 20) | 300 mg<br>(SEC, ESS = 25; PBO, ESS = 20)                  | 40 mg<br>( <i>n</i> = 151) | 150 mg<br>(ESS = 15)                                      | 300 mg<br>(ESS = 25)                                      | 40 mg<br>( <i>n</i> = 151)           | 150 mg<br>(ESS = 15)                                      | 300 mg<br>(ESS = 25)                                      |
| HAQ-DI score                       | -0.30<br>(-0.41, -0.19)                             | -0.33<br>(-0.43, -0.23)                  | <b>-0.47</b><br><b>(-0.60, -0.34)</b><br><i>P</i> = 0.046 | -0.40<br>(-0.48, -0.32)    | <b>-0.57</b><br><b>(-0.66, -0.48)</b><br><i>P</i> = 0.007 | <b>-0.64</b><br><b>(-0.75, -0.53)</b><br><i>P</i> < 0.001 | -0.40 <sup>d</sup><br>(-0.48, -0.32) | <b>-0.54</b><br><b>(-0.63, -0.45)</b><br><i>P</i> = 0.023 | <b>-0.68</b><br><b>(-0.80, -0.56)</b><br><i>P</i> < 0.001 |
| PGA (0–10 cm)                      | -20.0<br>(-25.9, -14.1)                             | -19.8<br>(-25.6, -13.9)                  | -24.9<br>(-31.2, -18.7)                                   | -21.1<br>(-25.8, -16.4)    | <b>-28.8</b><br><b>(-33.6, -24.1)</b><br><i>P</i> = 0.023 | <b>-32.0</b><br><b>(-37.4, -26.7)</b><br><i>P</i> = 0.003 | -22.4<br>(-25.6, -19.2)              | -24.6<br>(-30.5, -18.6)                                   | <b>-32.5</b><br><b>(-37.3, -27.7)</b><br><i>P</i> < 0.001 |
| Patient's assessment of pain (VAS) | -24.6<br>(-30.3, -18.9)                             | -16.8<br>(-23.0, -10.6)                  | -17.4<br>(-23.6, -11.3)                                   | -24.0<br>(-28.5, -19.5)    | -28.8<br>(-34.0, -23.7)                                   | -24.6<br>(-29.3, -19.9)                                   | -24.0<br>(-27.1, -20.9)              | -25.6<br>(-31.6, -19.6)                                   | -26.5<br>(-31.3, -21.6)                                   |
| FACIT-Fatigue score <sup>a</sup>   | 5.9<br>(3.7, 8.1)                                   | 7.6<br>(5.5, 9.7)                        | 4.3<br>(1.8, 6.8)                                         | 7.1<br>(5.5, 8.7)          | 8.7<br>(7.3, 10.1)                                        | 5.0<br>(3.2, 6.8)                                         | 6.7<br>(5.6, 7.8)                    | 7.7<br>(6.3, 9.1)                                         | 6.5<br>(4.7, 8.2)                                         |

ADA adalimumab, FACIT Functional Assessment of Chronic Illness Therapy, HAQ-DI health assessment questionnaire disability index, LOCF last observation carried forward,

PGA patient global assessment, SEC secukinumab, VAS visual analog scale

Data are shown as mean change from baseline (95% confidence interval)



Statistical significance (shown in bold text) defined as  $P < 0.05$  (two-sided)

All statistically significant observations were in favor of SEC

<sup>a</sup> Week 48 FACIT-Fatigue score comparisons were made between week 48 (ADEPT) and week 52 (FUTURE 2)
